# Supplementary material
Source: MDPI journal article supplement (https://www.mdpi.com/2297-8739/9/3/65)
Supplement: s1 [file s1]

*Supplementary Materials*

# Market Survey of Modern Oral Nicotine Products: Determination of Select HPHCs and Comparison to Traditional Smokeless Tobacco Products

Joseph J. Jablonski, Andrew G. Cheetham and Alexandra M. Martin\*

## Table of Contents

**Table S1.** Tabulated results on a per gram basis for select HPHC analytes in the chosen MONPs and STP comparators.

**Table S2.** Tabulated results on a per portion basis for select HPHC analytes in the chosen MONPs and STP comparators.

**Table S1.** Tabulated results on a per gram basis for select HPHC analytes in the chosen MONPs and STP comparators. Values are presented as the "average ± standard deviation". Analyses were performed in triplicate.

| Product Name                                 | ID | NAB<br>(ng/g) | NAT<br>(ng/g) | NNK<br>(ng/g) | NNN<br>(ng/g) | Nitrite<br>(µg/g) | BaP<br>(ng/g) | Acetaldehyde<br>(µg/g) | Crotonaldehyde<br>(µg/g) | Formaldehyde<br>(µg/g) | Arsenic<br>(ng/g) | Beryllium<br>(ng/g) | Cadmium<br>(ng/g) | Chromium<br>(ng/g) | Cobalt<br>(ng/g) | Lead<br>(ng/g) | Nickel<br>(ng/g) | Selenium<br>(ng/g) |
|----------------------------------------------|----|---------------|---------------|---------------|---------------|-------------------|---------------|------------------------|--------------------------|------------------------|-------------------|---------------------|-------------------|--------------------|------------------|----------------|------------------|--------------------|
| Velo Max Nicotine Pouches, 7 mg Wintergreen  | A1 | ND            | ND            | ND            | <LOQ          | 1.21 ± 0.52       | ND            | <LOQ                   | ND                       | 0.376 ± 0.092          | <LOQ              | ND                  | <LOQ              | 49.6 ± 22.3        | 6.41 ± 0.68      | 15.7 ± 1.3     | 45.8 ± 9.4       | ND                 |
| Velo Max Nicotine Pouches, 7 mg Black Cherry | A2 | ND            | ND            | ND            | ND            | 1.42 ± 0.29       | ND            | ND                     | ND                       | 0.334 ± 0.039          | <LOQ              | ND                  | ND                | 30.8 ± 1.2         | 4.49 ± 0.31      | 19.6 ± 4.1     | 39.4 ± 4.9       | ND                 |
| Velo Nicotine Pouches, 4 mg Mint             | A3 | ND            | ND            | ND            | ND            | <LOQ              | ND            | ND                     | ND                       | 3.33 ± 0.14            | ND                | ND                  | ND                | 27.3 ± 3.6         | <LOQ             | 3.88 ± 0.49    | <LOQ             | ND                 |
| Velo Nicotine Pouches, 4 mg Citrus           | A4 | ND            | ND            | ND            | ND            | <LOQ              | ND            | ND                     | ND                       | 2.81 ± 0.27            | ND                | ND                  | ND                | 30.6 ± 2.9         | <LOQ             | 4.86 ± 0.55    | <LOQ             | ND                 |
| on! Nicotine Pouches, 8 mg Wintergreen       | B1 | ND            | ND            | ND            | ND            | <LOQ              | ND            | ND                     | ND                       | 0.511 ± 0.016          | ND                | ND                  | ND                | 163 ± 11           | 5.38 ± 0.37      | 9.14 ± 0.42    | 55.0 ± 3.0       | ND                 |
| on! Nicotine Pouches, 8 mg Citrus            | B2 | ND            | ND            | ND            | ND            | 1.55 ± 0.05       | ND            | ND                     | ND                       | 0.807 ± 0.144          | ND                | <LOQ                | ND                | 142 ± 26           | 10.4 ± 2.0       | 10.5 ± 0.5     | 73.8 ± 9.5       | ND                 |
| on! Nicotine Pouches, 8 mg Berry             | B3 | ND            | ND            | ND            | ND            | <LOQ              | ND            | 0.557 ± 0.059          | ND                       | 0.534 ± 0.120          | <LOQ              | ND                  | ND                | 76.9 ± 2.5         | 5.85 ± 0.08      | 5.92 ± 0.85    | <LOQ             | <LOQ               |
| Rogue Pouches, 6 mg Mango                    | C1 | ND            | ND            | ND            | ND            | <LOQ              | ND            | ND                     | ND                       | 2.62 ± 0.12            | <LOQ              | <LOQ                | ND                | 236 ± 6            | 7.11 ± 0.28      | 81.9 ± 1.4     | 110 ± 6          | <LOQ               |
| Rogue Pouches, 6 mg Honey Lemon              | C2 | ND            | ND            | ND            | ND            | <LOQ              | ND            | ND                     | ND                       | 2.51 ± 0.16            | ND                | <LOQ                | ND                | 274 ± 4            | 8.47 ± 0.63      | 77.2 ± 1.0     | 138 ± 1          | <LOQ               |
| Rogue Pouches, 6 mg Wintergreen              | C3 | ND            | ND            | ND            | ND            | <LOQ              | ND            | ND                     | ND                       | 0.737 ± 0.091          | ND                | <LOQ                | ND                | 215 ± 4            | 7.93 ± 0.17      | 83.2 ± 2.0     | 92.5 ± 2.0       | <LOQ               |
| FRÉ, 12 mg Lush                              | D1 | ND            | ND            | ND            | ND            | <LOQ              | ND            | ND                     | ND                       | 0.326 ± 0.034          | ND                | ND                  | ND                | 129 ± 19           | <LOQ             | 14.3 ± 6.7     | 75.1 ± 7.5       | <LOQ               |
| Zyn Nicotine Pouches, 6 mg Citrus            | E1 | ND            | ND            | ND            | ND            | 1.26 ± 0.08       | ND            | 0.256 ± 0.017          | ND                       | 13.4 ± 0.4             | ND                | ND                  | <LOQ              | 22.5 ± 6.4         | <LOQ             | 17.2 ± 1.0     | ND               | <LOQ               |
| Zyn Nicotine Pouches, 6 mg Wintergreen       | E2 | ND            | ND            | ND            | ND            | ND                | ND            | 0.0958 ± 0.0147        | ND                       | 10.2 ± 0.7             | ND                | ND                  | <LOQ              | 31.0 ± 6.5         | <LOQ             | 16.2 ± 0.5     | <LOQ             | <LOQ               |
| Fully Loaded, Wintergreen Pouches            | F1 | ND            | <LOQ          | ND            | <LOQ          | <LOQ              | ND            | 3.13 ± 0.17            | ND                       | 0.335 ± 0.043          | 66.7 ± 8.3        | 5.68 ± 0.83         | 17.6 ± 1.5        | 334 ± 46           | 94.1 ± 6.8       | 119 ± 5        | 513 ± 80         | 25.4 ± 5.1         |
| Fully Loaded, Straight Pouches               | F2 | ND            | ND            | ND            | ND            | <LOQ              | ND            | 4.61 ± 0.7             | ND                       | 0.176 ± 0.048          | 63.8 ± 2.4        | 5.64 ± 0.13         | 17.2 ± 0.7        | 317 ± 12           | 96.0 ± 1.9       | 115 ± 9        | 456 ± 12         | 19.8 ± 0.5         |
| Fully Loaded, Peach Long Cut                 | F3 | ND            | ND            | ND            | ND            | <LOQ              | ND            | 23.5 ± 0.2             | ND                       | 1.10 ± 0.11            | 78.7 ± 2.9        | <LOQ                | 16.0 ± 0.5        | 391 ± 27           | 113 ± 4          | 98.1 ± 2.4     | 867 ± 6          | 31.8 ± 0.5         |
| Fully Loaded, Berry Long Cut                 | F4 | ND            | ND            | ND            | ND            | <LOQ              | 1.27 ± 0.04   | 6.70 ± 0.10            | ND                       | 0.160 ± 0.043          | 78.3 ± 2.7        | 5.07 ± 0.12         | 18.1 ± 0.9        | 456 ± 12           | 139 ± 2          | 159 ± 1        | 1155 ± 12        | 81.8 ± 4.9         |
| Black Buffalo, Straight Pouches              | G1 | ND            | <LOQ          | <LOQ          | <LOQ          | 1.51 ± 0.06       | ND            | 0.762 ± 0.042          | ND                       | 1.17 ± 0.08            | 17.9 ± 2.1        | <LOQ                | 59.0 ± 0.7        | 233 ± 47           | 30.4 ± 2.2       | 35.4 ± 1.6     | 186 ± 36         | 12.4 ± 4.3         |
| Black Buffalo, Wintergreen Pouches           | G2 | ND            | <LOQ          | <LOQ          | <LOQ          | 7.81 ± 0.03       | ND            | 0.502 ± 0.017          | ND                       | 0.848 ± 0.083          | 18.5 ± 0.8        | <LOQ                | 70.7 ± 0.5        | 259 ± 29           | 29.0 ± 1.3       | 35.6 ± 0.2     | 175 ± 11         | 15.85 ± 3.6        |
| Black Buffalo, Blood Orange Long Cut         | G3 | <LOQ          | 18.5 ± 0.3    | 13.7 ± 0.4    | 39.4 ± 1.3    | <LOQ              | ND            | 8.71 ± 0.47            | ND                       | 0.695 ± 0.048          | 30.4 ± 0.3        | <LOQ                | 86.0 ± 2.2        | 333 ± 22           | 52.4 ± 1.1       | 27.96 ± 4.3    | 331 ± 5          | 51.7 ± 3.6         |
| Black Buffalo, Peach Long Cut                | G4 | <LOQ          | 14.8 ± 1.3    | <LOQ          | 32.4 ± 0.8    | <LOQ              | ND            | 17.5 ± 0.8             | 0.0665 ± 0.0051          | 0.597 ± 0.168          | 25.5 ± 0.8        | <LOQ                | 83.7 ± 1.2        | 239 ± 47           | 45.6 ± 0.9       | 21.7 ± 2.2     | 294 ± 19         | 59.5 ± 5.5         |
| General Wintergreen White Portion            | H1 | 19.0 ± 0.6    | 256 ± 7       | 122 ± 2       | 337 ± 3       | <LOQ              | ND            | 5.71 ± 0.58            | ND                       | 0.853 ± 0.111          | 46.8 ± 0.8        | 5.69 ± 0.18         | 259 ± 3           | 242 ± 24           | 302 ± 3          | 107 ± 2        | 644 ± 11         | 93.5 ± 25.6        |
| Grizzly Wintergreen Long Cut                 | I1 | 167 ± 0.2     | 2201 ± 8      | 363 ± 2       | 1454 ± 52     | 2.01 ± 0.03       | 77.2 ± 2.0    | 2.49 ± 0.07            | ND                       | 1.79 ± 0.10            | 90.4 ± 5.6        | 7.24 ± 0.25         | 632 ± 5           | 295 ± 18           | 546 ± 6          | 123 ± 2        | 792 ± 5          | 113 ± 2            |
| CRP1.1                                       | J1 | 9.04 ± 0.07   | 125 ± 5       | 40.2 ± 2.5    | 177 ± 2       | <LOQ              | ND            | 5.46 ± 0.19            | ND                       | 0.776 ± 0.043          | 49.6 ± 5.6        | 6.52 ± 0.60         | 233 ± 17          | 336 ± 29           | 293 ± 22         | 107 ± 7        | 676 ± 55         | 136 ± 14           |
| CRP2.1                                       | J2 | 274 ± 5       | 4168 ± 29     | 2104 ± 26     | 3380 ± 65     | 2.65 ± 0.12       | 151 ± 3       | 3.43 ± 0.08            | ND                       | 3.64 ± 0.30            | 71.4 ± 1.3        | 9.88 ± 0.40         | 735 ± 12          | 401 ± 15           | 446 ± 10         | 182 ± 2        | 657 ± 9          | 197 ± 37           |

**Notes**

ND = not detected, i.e., below the limit of detection

<LOQ = below the limit of quantitation

**Table S2.** Tabulated results on a per portion basis for select HPHC analytes in the chosen MONPs and STP comparators. Values are presented as the "average ± standard deviation". Analyses were performed in triplicate.

| Product Name                                 | ID | NAB<br>(ng/portion) | NAT<br>(ng/portion) | NNK<br>(ng/portion) | NNN<br>(ng/portion) | Nitrite<br>(µg/portion) | BaP<br>(ng/portion) | Acetaldehyde<br>(µg/portion) | Crotonaldehyde<br>(µg/portion) | Formaldehyde<br>(µg/portion) | Arsenic<br>(ng/portion) | Beryllium<br>(ng/portion) | Cadmium<br>(ng/portion) | Chromium<br>(ng/portion) | Cobalt<br>(ng/portion) | Lead<br>(ng/portion) | Nickel<br>(ng/portion) | Selenium<br>(ng/portion) |
|----------------------------------------------|----|---------------------|---------------------|---------------------|---------------------|-------------------------|---------------------|------------------------------|--------------------------------|------------------------------|-------------------------|---------------------------|-------------------------|--------------------------|------------------------|----------------------|------------------------|--------------------------|
| Velo Max Nicotine Pouches, 7 mg Wintergreen  | A1 | ND                  | ND                  | ND                  | <LOQ                | 0.408 ± 0.179           | ND                  | <LOQ                         | ND                             | 0.138 ± 0.032                | <LOQ                    | ND                        | <LOQ                    | 18.5 ± 8.6               | 2.38 ± 0.30            | 5.82 ± 0.57          | 17.0 ± 3.7             | ND                       |
| Velo Max Nicotine Pouches, 7 mg Black Cherry | A2 | ND                  | ND                  | ND                  | ND                  | 0.475 ± 0.095           | ND                  | ND                           | ND                             | 0.124 ± 0.013                | <LOQ                    | ND                        | ND                      | 11.3 ± 0.5               | 1.65 ± 0.11            | 7.20 ± 1.53          | 14.4 ± 1.8             | ND                       |
| Velo Nicotine Pouches, 4 mg Mint             | A3 | ND                  | ND                  | ND                  | ND                  | <LOQ                    | ND                  | ND                           | ND                             | 1.40 ± 0.07                  | ND                      | ND                        | ND                      | 11.2 ± 1.5               | <LOQ                   | 1.6 ± 0.20           | <LOQ                   | ND                       |
| Velo Nicotine Pouches, 4 mg Citrus           | A4 | ND                  | ND                  | ND                  | ND                  | <LOQ                    | ND                  | ND                           | ND                             | 1.21 ± 0.12                  | ND                      | ND                        | ND                      | 12.1 ± 0.9               | <LOQ                   | 1.92 ± 0.18          | <LOQ                   | ND                       |
| on! Nicotine Pouches, 8 mg Wintergreen       | B1 | ND                  | ND                  | ND                  | ND                  | <LOQ                    | ND                  | ND                           | ND                             | 0.139 ± 0.005                | ND                      | ND                        | ND                      | 43.5 ± 3.0               | 1.44 ± 0.10            | 2.44 ± 0.12          | 14.7 ± 0.9             | ND                       |
| on! Nicotine Pouches, 8 mg Citrus            | B2 | ND                  | ND                  | ND                  | ND                  | 0.463 ± 0.022           | ND                  | ND                           | ND                             | 0.210 ± 0.038                | ND                      | <LOQ                      | ND                      | 36.8 ± 7.4               | 2.69 ± 0.56            | 2.72 ± 0.07          | 19.1 ± 2.9             | ND                       |
| on! Nicotine Pouches, 8 mg Berry             | B3 | ND                  | ND                  | ND                  | ND                  | <LOQ                    | ND                  | 0.137 ± 0.008                | ND                             | 0.135 ± 0.046                | <LOQ                    | ND                        | ND                      | 20.7 ± 0.8               | 1.57 ± 0.03            | 1.59 ± 0.22          | <LOQ                   | <LOQ                     |
| Rogue Pouches, 6 mg Mango                    | C1 | ND                  | ND                  | ND                  | ND                  | <LOQ                    | ND                  | ND                           | ND                             | 1.76 ± 0.11                  | <LOQ                    | <LOQ                      | ND                      | 141 ± 17                 | 4.25 ± 0.62            | 48.9 ± 6.5           | 65.7 ± 6.4             | <LOQ                     |
| Rogue Pouches, 6 mg Honey Lemon              | C2 | ND                  | ND                  | ND                  | ND                  | <LOQ                    | ND                  | ND                           | ND                             | 1.68 ± 0.15                  | ND                      | <LOQ                      | ND                      | 177 ± 10                 | 5.47 ± 0.61            | 49.8 ± 2.8           | 89.1 ± 4.4             | <LOQ                     |
| Rogue Pouches, 6 mg Wintergreen              | C3 | ND                  | ND                  | ND                  | ND                  | <LOQ                    | ND                  | ND                           | ND                             | 0.550 ± 0.060                | ND                      | <LOQ                      | ND                      | 145 ± 13                 | 5.33 ± 0.43            | 56.0 ± 5.6           | 62.2 ± 4.8             | <LOQ                     |
| FRÉ, 12 mg Lush                              | D1 | ND                  | ND                  | ND                  | ND                  | <LOQ                    | ND                  | ND                           | ND                             | 0.157 ± 0.017                | ND                      | ND                        | ND                      | 61.7 ± 11.9              | <LOQ                   | 6.79 ± 2.92          | 36.0 ± 5.1             | <LOQ                     |
| Zyn Nicotine Pouches, 6 mg Citrus            | E1 | ND                  | ND                  | ND                  | ND                  | 0.509 ± 0.029           | ND                  | 0.100 ± 0.007                | ND                             | 5.24 ± 0.15                  | ND                      | ND                        | <LOQ                    | 7.57 ± 1.49              | <LOQ                   | 5.90 ± 0.90          | ND                     | <LOQ                     |
| Zyn Nicotine Pouches, 6 mg Wintergreen       | E2 | ND                  | ND                  | ND                  | ND                  | 0.489 ± 0.089           | ND                  | 0.0384 ± 0.0059              | ND                             | 4.08 ± 0.27                  | ND                      | ND                        | <LOQ                    | 11.2 ± 3.0               | <LOQ                   | 5.43 ± 0.48          | <LOQ                   | <LOQ                     |
| Fully Loaded, Wintergreen Pouches            | F1 | ND                  | <LOQ                | ND                  | <LOQ                | <LOQ                    | ND                  | 4.58 ± 0.48                  | ND                             | 0.488 ± 0.036                | 106 ± 15                | 9.04 ± 1.62               | 28.0 ± 2.2              | 530 ± 73                 | 149 ± 14               | 188 ± 15             | 812 ± 106              | 39.1 ± 6.0               |
| Fully Loaded, Straight Pouches               | F2 | ND                  | ND                  | ND                  | ND                  | <LOQ                    | ND                  | 6.92 ± 1.32                  | ND                             | 0.266 ± 0.087                | 99.4 ± 6.6              | 8.81 ± 1.01               | 26.8 ± 3.1              | 493 ± 32                 | 150 ± 14               | 180 ± 28             | 711 ± 60               | 30.8 ± 2.6               |
| Fully Loaded, Peach Long Cut                 | F3 | ND                  | ND                  | ND                  | ND                  | <LOQ                    | ND                  | 23.5 ± 0.2                   | ND                             | 1.10 ± 0.11                  | 78.7 ± 2.9              | <LOQ                      | 16.0 ± 0.5              | 391 ± 27                 | 113 ± 4                | 98.1 ± 2.4           | 867 ± 6                | 31.8 ± 0.5               |
| Fully Loaded, Berry Long Cut                 | F4 | ND                  | ND                  | ND                  | ND                  | <LOQ                    | 1.27 ± 0.04         | 6.70 ± 0.1                   | ND                             | 0.160 ± 0.043                | 78.3 ± 2.7              | 5.07 ± 0.12               | 18.1 ± 0.9              | 456 ± 12                 | 139 ± 2                | 159 ± 1              | 1155 ± 12              | 81.8 ± 4.9               |
| Black Buffalo, Straight Pouches              | G1 | ND                  | <LOQ                | <LOQ                | <LOQ                | 1.63 ± 0.07             | ND                  | 0.836 ± 0.079                | ND                             | 1.28 ± 0.09                  | 19.0 ± 6.4              | <LOQ                      | 69.6 ± 2.0              | 249 ± 96                 | 35.9 ± 2.              | 41.8 ± 2.8           | 219 ± 41               | 14.6 ± 4.9               |
| Black Buffalo, Wintergreen Pouches           | G2 | ND                  | <LOQ                | <LOQ                | <LOQ                | 8.25 ± 0.27             | ND                  | 0.503 ± 0.02                 | ND                             | 0.847 ± 0.070                | 19.8 ± 0.8              | <LOQ                      | 75.7 ± 1.5              | 277 ± 31                 | 31.0 ± 1.2             | 38.1 ± 0.5           | 187 ± 12               | 16.9 ± 4.0               |
| Black Buffalo, Blood Orange Long Cut         | G3 | <LOQ                | 18.5 ± 0.3          | 13.7 ± 0.4          | 39.4 ± 1.3          | <LOQ                    | ND                  | 8.71 ± 0.47                  | ND                             | 0.695 ± 0.048                | 30.4 ± 0.3              | <LOQ                      | 86.0 ± 2.2              | 333 ± 22                 | 52.4 ± 1.1             | 27.9 ± 4.3           | 331 ± 5                | 51.7 ± 3.6               |
| Black Buffalo, Peach Long Cut                | G4 | <LOQ                | 14.8 ± 1.3          | <LOQ                | 32.4 ± 0.8          | <LOQ                    | ND                  | 17.5 ± 0.8                   | 0.0665 ± 0.0051                | 0.597 ± 0.168                | 25.5 ± 0.8              | <LOQ                      | 83.7 ± 1.2              | 239 ± 47                 | 45.6 ± 0.9             | 21.7 ± 2.2           | 294 ± 19               | 59.5 ± 5.5               |
| General Wintergreen White Portion            | H1 | 19.6 ± 0.3          | 264 ± 5             | 125 ± 6             | 348 ± 18            | <LOQ                    | ND                  | 5.40 ± 0.51                  | ND                             | 0.806 ± 0.090                | 45.2 ± 2.0              | 5.49 ± 0.31               | 250 ± 10                | 234 ± 25                 | 292 ± 9                | 104 ± 2              | 622 ± 19               | 90.8 ± 27.3              |
| Grizzly Wintergreen Long Cut                 | I1 | 167 ± 0.2           | 2201 ± 8            | 363 ± 2             | 1454 ± 52           | 2.01 ± 0.03             | 77.2 ± 2.0          | 2.49 ± 0.07                  | ND                             | 1.79 ± 0.10                  | 90.4 ± 5.6              | 7.24 ± 0.25               | 632 ± 5                 | 295 ± 18                 | 546 ± 6                | 123 ± 2              | 792 ± 5                | 113 ± 2                  |
| CRP1.1                                       | J1 | 8.90 ± 0.31         | 123 ± 6             | 39.5 ± 2.0          | 174 ± 3             | <LOQ                    | ND                  | 5.57 ± 0.10                  | ND                             | 0.791 ± 0.059                | 51.7 ± 4.1              | 6.80 ± 0.39               | 244 ± 9                 | 350 ± 14                 | 306 ± 11               | 112 ± 4              | 705 ± 31               | 142 ± 14                 |
| CRP2.1                                       | J2 | 274 ± 5             | 4168 ± 29           | 2104 ± 26           | 3380 ± 65           | 2.65 ± 0.12             | 151 ± 3             | 3.43 ± 0.08                  | ND                             | 3.64 ± 0.30                  | 71.4 ± 1.3              | 9.88 ± 0.40               | 735 ± 12                | 401 ± 15                 | 446 ± 10               | 182 ± 2              | 657 ± 9                | 197 ± 37                 |

**Notes**

ND = not detected, i.e., below the limit of detection

<LOQ = below the limit of quantitation

Pouch product results are based on the actual number of pouches used to meet the respective method sample mass requirements.

Long cut product results are based on a nominal 1 g portion size.
